# Supplementary material for: Microarray Analyses of Glucocorticoid and Vitamin D3 Target Genes in Differentiating Cultured Human Podocytes
Source: PubMed Central journal article supplement (PMC3617172; doi:10.1371/journal.pone.0060213), 2013-04-04
Supplement: pone.0060213.s002.pdf [file pone.0060213.s002.pdf]

**A**Sample relations based on 8255 genes with  $sd/mean > 0.1$ 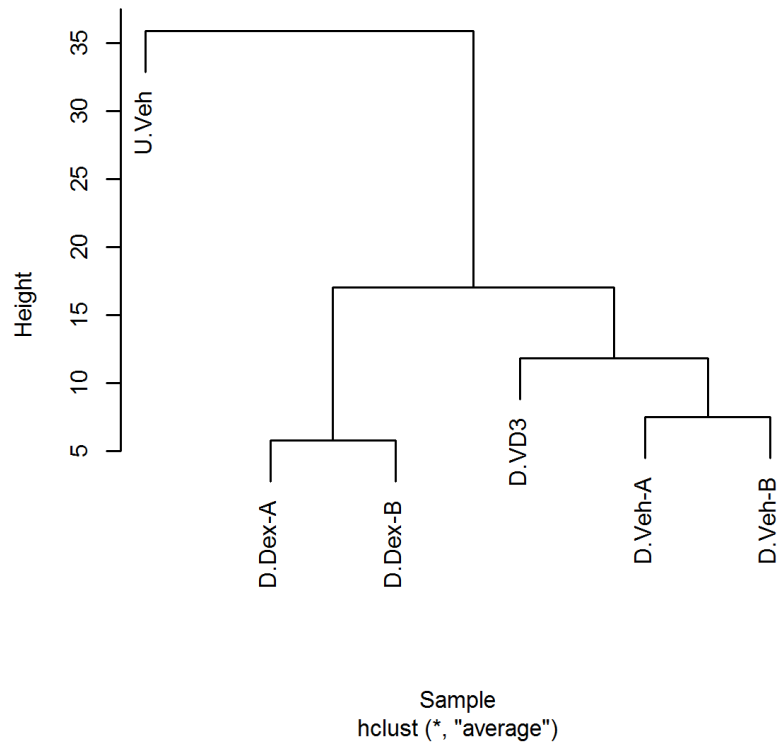**B**

Pairwise MA plots between samples

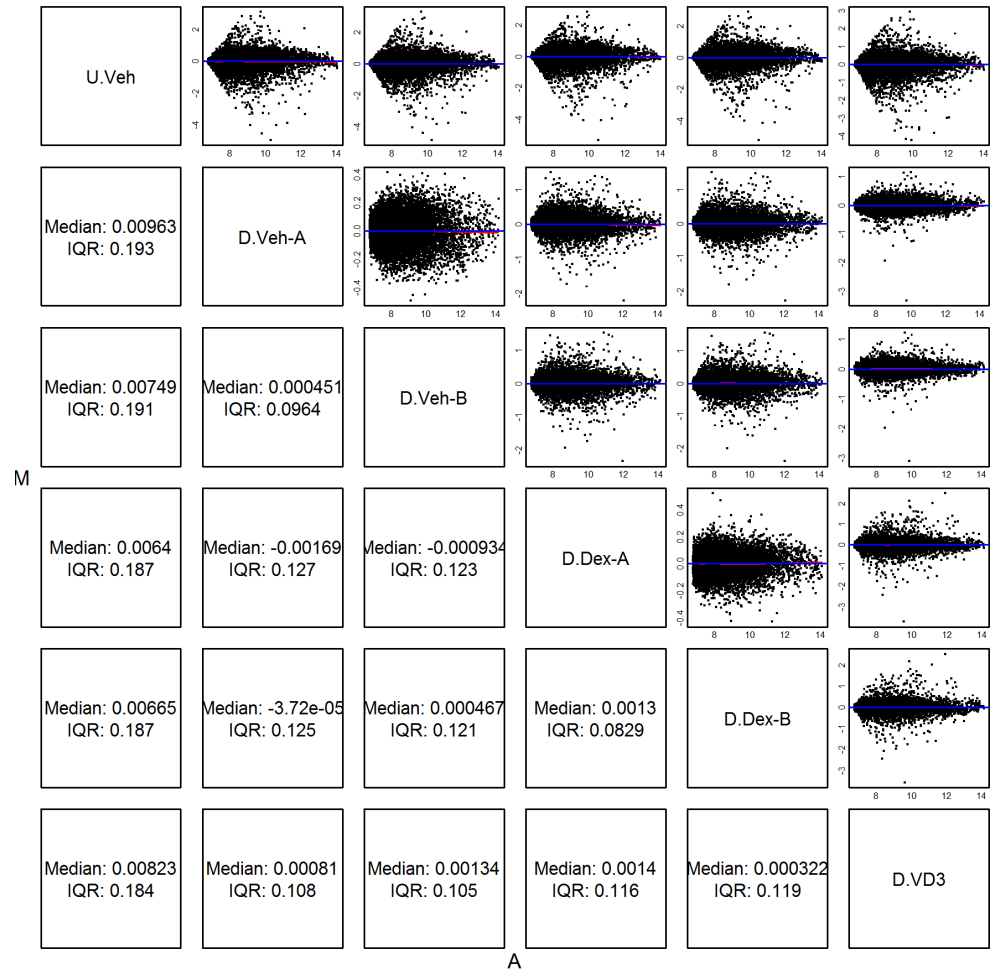**Figure S2**
