# Supplementary material for: Microarray Analyses of Glucocorticoid and Vitamin D3 Target Genes in Differentiating Cultured Human Podocytes
Source: PubMed Central journal article supplement (PMC3617172; doi:10.1371/journal.pone.0060213), 2013-04-04
Supplement: pone.0060213.s008.pdf [file pone.0060213.s008.pdf]

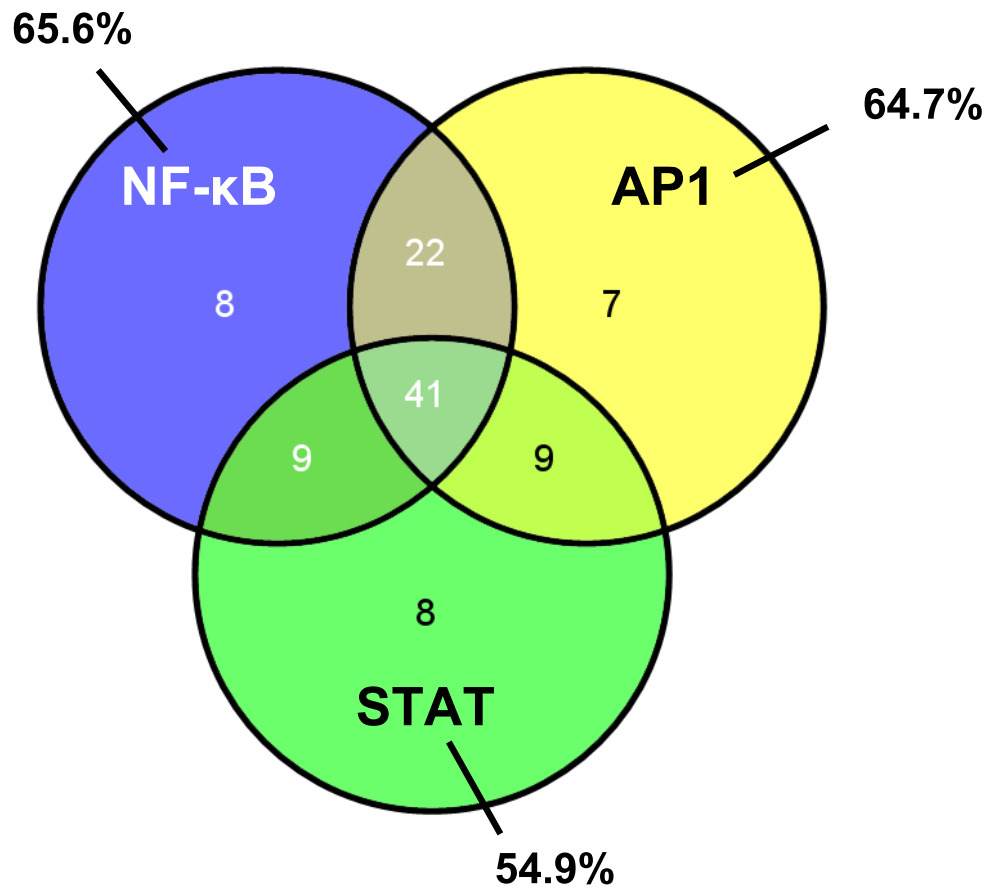

**Figure S8**
